# Supplementary material for: Association of Calcineurin with the COPI Protein Sec28 and the COPII Protein Sec13 Revealed by Quantitative Proteomics
Source: PubMed Central journal article supplement (PMC3184950; doi:10.1371/journal.pone.0025280), 2011-10-03
Supplement: pone.0025280.s001.pdf [file pone.0025280.s001.pdf]

**Table S1. Proteins identified as associated with Cna1 and grouped according to cellular function/location.**

| CNAG<br>*                               | Description                                    | kDa | Peptide<br>count | Affinity<br>Class |   |   | 24°C vs 37°C<br>Quantitation |         | Stat.<br>signif<br>. |
|-----------------------------------------|------------------------------------------------|-----|------------------|-------------------|---|---|------------------------------|---------|----------------------|
|                                         |                                                |     |                  | H                 | M | L | Fold<br>change**             | P-value |                      |
| 00888                                   | calcium-dependent protein phosphatase Cnb1     | 20  | 11               | X                 |   |   | 1.4                          | 6.4E-04 |                      |
| 00802                                   | calcineurin-binding protein, calcipressin Cbp1 | 27  | 11               | X                 |   |   | -3.2                         | 1.5E-24 | X                    |
| <b>Proteins related to mitochondria</b> |                                                |     |                  |                   |   |   |                              |         |                      |
| 00162                                   | alternative oxidase                            | 44  | 3                | X                 |   |   | -6.6                         | 3.8E-01 |                      |
| 03824                                   | Phosphate transport protein MIR1               | 34  | 3                | X                 |   |   | -6.2                         | 3.6E-01 |                      |
| 03106                                   | 54S ribosomal protein L35,                     | 43  | 2                | X                 |   |   | -1.0                         | 9.6E-01 |                      |
| 04709                                   | ribosomal protein L23                          | 40  | 2                | X                 |   |   | 4.4                          | 2.8E-01 |                      |
| 05809                                   | Ferrochelatase Hem15                           | 45  | 2                | X                 |   |   | -1.5                         | 7.1E-01 |                      |
| 00499                                   | carnitine/acyl carnitine carrier               | 33  | 2                | X                 |   |   | 6.8                          | 5.4E-01 |                      |
| 03931                                   | import receptor subunit Tom40                  | 41  | 5                |                   | X |   | 1.5                          | 7.4E-02 |                      |
| 01688                                   | ATP-dependent peptidase                        | 77  | 3                |                   | X |   | -1.0                         | 9.8E-01 |                      |
| 00747                                   | succinate-CoA ligase                           | 45  | 10               |                   | X |   | -1.6                         | 9.8E-02 |                      |
| 01639                                   | elongation factor G 1                          | 90  | 5                |                   | X |   | -2.3                         | 1.3E-02 |                      |
| 07810                                   | mitofilin                                      | 80  | 8                |                   |   | X | -2.6                         | 9.4E-06 | X                    |
| 05909                                   | electron transporter                           | 35  | 4                |                   |   | X | 1.4                          | 4.9E-01 |                      |
| 02315                                   | ubiquinol-cytochrome c reductase               | 30  | 4                |                   |   | X | -2.3                         | 2.4E-01 |                      |
| 00533                                   | inner membrane translocase subunit TIM50       | 57  | 3                |                   |   | X | -1.4                         | 4.5E-01 |                      |
| 05132                                   | cytochrome c oxidase                           | 17  | 2                |                   |   | X | -1.9                         | 5.5E-01 |                      |
| 03225                                   | malate dehydrogenase                           | 36  | 6                |                   |   | X | 6.9                          | 8.5E-04 | X                    |
| 00237                                   | 3-isopropylmalate dehydratase                  | 83  | 5                |                   |   | X | -1.3                         | 3.5E-01 |                      |
| 03596                                   | dihydrolipoamide succinyltransferase           | 49  | 5                |                   |   | X | 6.3                          | 2.7E-08 | X                    |
| 07908                                   | aconitate hydratase                            | 84  | 2                |                   |   | X | -1.8                         | 2.4E-01 |                      |
| 07660                                   | pyruvate dehydrogenase e1 component alpha      | 46  | 2                |                   |   | X | 1.0                          | 9.8E-01 |                      |
| 05031                                   | succinyl-CoA:3-ketoacid-coenzyme A transferase | 60  | 2                |                   |   | X | 2.8                          | 3.5E-01 |                      |
| 01586                                   | ATP synthase                                   | 26  | 3                |                   |   | X | 3.1                          | 3.5E-01 |                      |
| <b>Amino acid metabolism</b>            |                                                |     |                  |                   |   |   |                              |         |                      |
| 06370                                   | branched-chain-amino-acid aminotransferase     | 47  | 4                | X                 |   |   | 2.0                          | 1.6E-01 |                      |
| 00622                                   | acetylornithine transaminase                   | 50  | 7                |                   | X |   | 1.4                          | 4.6E-01 |                      |
| 04990                                   | glutamate-5-semialdehyde dehydrogenase         | 49  | 6                |                   | X |   | 5.1                          | 3.9E-03 | X                    |
| 05398                                   | phosphoserine transaminase                     | 45  | 5                |                   | X |   | 4.2                          | 4.3E-02 |                      |
| 04951                                   | phospho-2-dehydro-3-deoxyheptonate aldolase    | 40  | 4                |                   | X |   | 1.0                          | 9.9E-01 |                      |
| 02686                                   | cystathionine beta-lyase                       | 98  | 2                |                   | X |   | -1.9                         | 5.2E-01 |                      |
| 05602                                   | 1-pyrroline-5-carboxylate dehydrogenase        | 60  | 18               |                   |   | X | 32.5                         | 0.0E+0  | X                    |
| 03457                                   | arginine-tRNA ligase                           | 70  | 8                |                   |   | X | 10.8                         | 1.2E-11 | X                    |
| 06755                                   | threonine-tRNA ligase                          | 84  | 7                |                   |   | X | 2.0                          | 8.6E-02 |                      |
| 04604                                   | tryptophan-tRNA ligase                         | 68  | 3                |                   |   | X | -2.4                         | 2.7E-01 |                      |
| 01305                                   | methionyl-tRNA synthetase                      | 81  | 3                |                   |   | X | 1.0                          | 9.7E-01 |                      |
| 02763                                   | phenylalanyl-tRNA synthetase                   | 71  | 7                |                   |   | X | 1.4                          | 4.5E-01 |                      |
| 02825                                   | argininosuccinate lyase                        | 53  | 7                |                   |   | X | 172.4                        | 2.1E-21 | X                    |
| 04347                                   | aspartate kinase                               | 66  | 4                |                   |   | X | 2.0                          | 3.4E-01 |                      |
| 00649                                   | tryptophan synthase                            | 77  | 4                |                   |   | X | -1.1                         | 7.3E-01 |                      |
| 04156                                   | homoserine kinase                              | 38  | 2                |                   |   | X | 48.2                         | 5.3E-02 |                      |
| <b>Glucose metabolism</b>               |                                                |     |                  |                   |   |   |                              |         |                      |
| 00057                                   | fructose-bisphosphatase                        | 38  | 4                | X                 |   |   | -270.6                       | 2.1E-02 |                      |
| 00697                                   | UDP-glucose epimerase                          | 41  | 2                | X                 |   |   | 4.8                          | 1.1E-01 |                      |
| 02664                                   | D-lactate dehydrogenase                        | 58  | 3                |                   | X |   | 5.7                          | 2.9E-02 |                      |
| 01820                                   | pyruvate kinase                                | 57  | 8                |                   |   | X | 4.0                          | 4.4E-06 |                      |

|                                                                  |                                                          |     |    |   |   |   |        |         |   |
|------------------------------------------------------------------|----------------------------------------------------------|-----|----|---|---|---|--------|---------|---|
| 04969                                                            | UDP-glucose dehydrogenase                                | 51  | 6  |   |   | X | 4.0    | 2.9E-02 |   |
| 06770                                                            | fructose-bisphosphate aldolase                           | 39  | 5  |   |   | X | -1.0   | 9.0E-01 |   |
| 06699                                                            | glyceraldehyde-3-phosphate dehydrogenase                 | 36  | 4  |   |   | X | -1.1   | 8.5E-01 |   |
| 06900                                                            | phosphoglycerate mutase                                  | 59  | 3  |   |   | X | -3.9   | 1.3E-01 |   |
| 06313                                                            | phosphoglucomutase                                       | 62  | 2  |   |   | X | 2.9    | 3.0E-01 |   |
| <b>Pentose phosphate pathway</b>                                 |                                                          |     |    |   |   |   |        |         |   |
| 03245                                                            | glucose-6-phosphate 1-dehydrogenase                      | 57  | 6  |   |   | X | 6.1    | 2.3E-03 |   |
| 01984                                                            | transaldolase                                            | 35  | 6  |   |   | X | -1.5   | 3.5E-01 |   |
| 07561                                                            | phosphogluconate dehydrogenase                           | 54  | 5  |   |   | X | 6.2    | 1.4E-05 |   |
| <b>Pyrimidine, purine metabolism</b>                             |                                                          |     |    |   |   |   |        |         |   |
| 03335                                                            | ribose-phosphate diphosphokinase                         | 36  | 2  | X |   |   | 1.8    | 4.3E-01 |   |
| 00143                                                            | phosphoribosylamidoimidazole-succinocarboxamide synthase | 90  | 8  |   | X |   | -1.9   | 3.8E-02 |   |
| 07502                                                            | CTP synthase                                             | 70  | 7  |   | X |   | 2.7    | 6.6E-02 |   |
| 00700                                                            | bifunctional purine biosynthesis protein PURH            | 65  | 13 |   |   | X | 9.0    | 2.6E-16 |   |
| 02858                                                            | adenylosuccinate synthase                                | 47  | 7  |   |   | X | 2.1    | 5.0E-02 |   |
| 00441                                                            | IMP dehydrogenase                                        | 58  | 5  |   |   | X | 24.8   | 4.0E-03 | X |
| 01877                                                            | GMP synthase                                             | 60  | 2  |   |   | X | 1.3    | 7.2E-01 |   |
| 02794                                                            | dihydroorotate dehydrogenase                             | 57  | 2  |   |   | X | -3.3   | 5.4E-01 |   |
| <b>Other cell metabolism proteins</b>                            |                                                          |     |    |   |   |   |        |         |   |
| 01745                                                            | sn-glycerol-3-phosphate dehydrogenase NAD                | 42  | 3  | X |   |   | -1.7   | 5.8E-01 |   |
| 01528                                                            | serine hydrolase, ovarian cancer-associated gene 2       | 33  | 2  | X |   |   | 1.2    | 8.6E-01 |   |
| 04687                                                            | stearoyl-CoA 9-desaturase                                | 66  | 2  | X |   |   | 3.0    | 3.2E-01 |   |
| 06001                                                            | phosphomevalonate kinase                                 | 59  | 2  | X |   |   | 1.6    | 7.1E-01 |   |
| 00345                                                            | porphobilinogen synthase                                 | 36  | 2  | X |   |   | 2.5    | 5.6E-01 |   |
| 06908                                                            | pyridoxine biosynthesis protein                          | 35  | 6  |   | X |   | 2.9    | 1.6E-02 |   |
| 04605                                                            | C-3 sterol dehydrogenase                                 | 49  | 2  |   | X |   | 37.6   | 1.3E-03 |   |
| 01577                                                            | glutamate dehydrogenase                                  | 49  | 12 |   |   | X | 12.1   | 4.4E-27 |   |
| 05292                                                            | alpha, alpha-trehalose-phosphate synthase                | 74  | 4  |   |   | X | -9.3   | 6.4E-08 | X |
| 02918                                                            | acetyl-CoA C-acetyltransferase                           | 42  | 3  |   |   | X | 8.4    | 8.3E-02 |   |
| 03322                                                            | UDP-xylose synthase                                      | 47  | 2  |   |   | X | 18.8   | 2.3E-03 | X |
| 06535                                                            | Ribosomal L1 domain containing protein                   | 39  | 2  |   |   | X | 8.7    | 1.8E-01 |   |
| 06421                                                            | acetolactate synthase                                    | 39  | 2  |   |   | X | -3.1   | 3.5E-01 |   |
| 01102                                                            | oxidoreductase                                           | 33  | 4  |   |   | X | -30.6  | 4.6E-02 |   |
| <b>Proteins involved in cell trafficking and membrane fusion</b> |                                                          |     |    |   |   |   |        |         |   |
| 01031                                                            | Yop1, ER associated Ypt Interacting Protein.             | 41  | 3  | X |   |   | -6.5   | 4.8E-01 |   |
| 01211                                                            | An epsilon-COPI subunit of the coatomer, Sec28           | 33  | 2  | X |   |   | -1.7   | 4.7E-01 |   |
| 04194                                                            | protein transport protein Sec13                          | 36  | 4  |   | X |   | -1.2   | 5.5E-01 |   |
| 00565                                                            | Vps1                                                     | 77  | 6  |   |   | X | -1.8   | 8.1E-02 |   |
| 03853                                                            | small COPII coat GTPase SAR1                             | 21  | 2  |   |   | X | 1.5    | 7.9E-01 |   |
| 01274                                                            | coatomer subunit gamma, Sec21                            | 101 | 2  |   |   | X | -3.2   | 2.1E-01 |   |
| <b>Proteins related to heat shock proteins</b>                   |                                                          |     |    |   |   |   |        |         |   |
| 01696                                                            | DNAj protein                                             | 58  | 2  | X |   |   | -5.8   | 3.3E-01 |   |
| 00305                                                            | chaperone activator                                      | 40  | 5  |   | X |   | -3.0   | 2.4E-03 | X |
| 03891                                                            | heat shock protein                                       | 61  | 22 |   |   | X | 2.3    | 3.0E-13 | X |
| 07347                                                            | heat shock protein                                       | 100 | 21 |   |   | X | -166.8 | 6.5E-27 | X |
| 01404                                                            | hsp71-like protein                                       | 64  | 11 |   |   | X | -1.2   | 8.9E-02 |   |
| 06208                                                            | heat shock protein                                       | 86  | 10 |   |   | X | -5.7   | 8.8E-11 | X |
| 03347                                                            | chaperone                                                | 92  | 7  |   |   | X | -10.6  | 1.3E-05 | X |
| 01750                                                            | chaperone                                                | 70  | 6  |   |   | X | -2.0   | 0.0E+0  | X |
| 07346                                                            | t-complex protein 1                                      | 61  | 6  |   |   | X | 1.7    | 2.4E-01 |   |
| 04976                                                            | Ribosome associated DnaJ chaperone Zuotin                | 51  | 5  |   |   | X | 3.1    | 2.1E-02 |   |
| 06106                                                            | chaperone regulator                                      | 37  | 3  |   |   | X | -3.2   | 2.8E-01 |   |
| 07558                                                            | wos2 protein                                             | 25  | 2  |   |   | X | -2.2   | 7.2E-01 |   |

| Proteins related to proteins synthesis |                                                |    |   |   |   |   |       |         |   |
|----------------------------------------|------------------------------------------------|----|---|---|---|---|-------|---------|---|
| 01548                                  | eIF4A homologue                                | 45 | 3 | X |   |   | 2.9   | 1.3E-01 |   |
| 02677                                  | Tma46 homologue                                | 40 | 2 |   | X |   | -1.1  | 9.2E-01 |   |
| 00413                                  | 2OG-Fe(II) oxygenase Tpa1                      | 74 | 2 |   | X |   | -2.0  | 5.0E-01 |   |
| 02657                                  | eIF3 subunit G                                 | 32 | 4 |   | X |   | 1.2   | 6.6E-01 |   |
| 06563                                  | eIF3 subunit EifCf                             | 33 | 4 |   |   | X | 1.6   | 6.8E-01 |   |
| 06061                                  | eIF3 subunit 6                                 | 52 | 3 |   |   | X | 2.6   | 6.1E-02 |   |
| 02507                                  | eIF3 subunit 3                                 | 41 | 2 |   |   | X | -1.1  | 9.6E-01 |   |
| 00509                                  | eIF3 subunit M                                 | 49 | 4 |   |   | X | 3.1   | 3.4E-04 | X |
| 02486                                  | eIF2 beta subunit                              | 36 | 5 |   |   | X | 143.4 | 1.9E-05 | X |
| 01833                                  | eIF4E homologue                                | 33 | 4 |   |   | X | 3.8   | 1.4E-03 | X |
| 04628                                  | eIF6                                           | 26 | 2 |   |   | X | 1.8   | 6.8E-01 |   |
| 02948                                  | Polypeptide release factor                     | 54 | 4 |   |   | X | 6.5   | 1.3E-02 |   |
| 01270                                  | W2 domain-containing protein,                  | 49 | 3 |   |   | X | 56.8  | 1.3E-02 |   |
| 00754                                  | Rli1 homologue                                 | 68 | 4 |   |   | X | 36.9  | 5.4E-06 | X |
| Proteins related to proteasome         |                                                |    |   |   |   |   |       |         |   |
| 07719                                  | 26S protease regulatory subunit                | 47 | 3 | X |   |   | 6.2   | 2.1E-01 |   |
| 06153                                  | 26S protease regulatory subunit                | 52 | 4 |   | X |   | 7.4   | 1.6E-02 |   |
| 04666                                  | 26S protease regulatory subunit 6B             | 45 | 2 |   | X |   | -1.0  | 9.9E-01 |   |
| 00062                                  | 26S proteasome non-ATPase regulatory subunit 3 | 59 | 8 |   |   | X | 4.0   | 4.5E-04 | X |
| 02239                                  | 26S proteasome regulatory subunit 4            | 49 | 3 |   |   | X | 12.5  | 2.1E-04 | X |
| Other                                  |                                                |    |   |   |   |   |       |         |   |
| 02672                                  | RNA binding protein Nmd3                       | 63 | 3 | X |   |   | 10.9  | 1.2E-01 |   |
| 06742                                  | C2H2-type zinc finger protein                  | 46 | 3 | X |   |   | 42.9  | 5.0E-02 |   |
| 00108                                  | RuvB-like helicase 1                           | 52 | 2 | X |   |   | 4.5   | 2.7E-01 |   |
| 03541                                  | protein with the PP2C domain                   | 41 | 2 | X |   |   | 1.3   | 7.3E-01 |   |
| 03584                                  | U5 snRNP-specific protein                      | 40 | 2 | X |   |   | 2.5   | 4.2E-01 |   |
| 05091                                  | conserved hypothetical protein                 | 23 | 2 | X |   |   | 4.8   | 5.0E-01 |   |
| 03863                                  | histone H4 arginine methyltransferase RmtA     | 39 | 5 |   | X |   | 1.9   | 2.7E-01 |   |
| 04948                                  | tubulin beta chain                             | 49 | 4 |   | X |   | 2.8   | 8.0E-02 |   |
| 01780                                  | Drg1 homologue                                 | 41 | 4 |   | X |   | 3.9   | 1.1E-01 |   |
| 01136                                  | conserved hypothetical protein                 | 38 | 4 |   | X |   | 4.5   | 1.1E-01 |   |
| 07637                                  | LSU ribosomal protein L3P                      | 34 | 2 |   | X |   | 1.3   | 7.4E-01 |   |
| 02880                                  | YchF homologue                                 | 50 | 8 |   |   | X | 1.4   | 3.0E-01 |   |
| 02943                                  | Slm1 homologue                                 | 61 | 5 |   |   | X | -32.4 | 2.5E-07 | X |
| 06746                                  | histone h2b                                    | 15 | 4 |   |   | X | 2.4   | 5.4E-03 | X |
| 04028                                  | RNA binding protein                            | 39 | 4 |   |   | X | 1.2   | 7.4E-01 |   |
| 06633                                  | 40s ribosomal protein s15                      | 17 | 3 |   |   | X | 1.3   | 2.2E-01 |   |
| 01361                                  | importin alpha subunit                         | 59 | 3 |   |   | X | 10.0  | 3.1E-04 | X |
| 03052                                  | PP2Cc protein phosphatase                      | 55 | 3 |   |   | X | -2.2  | 1.6E-01 |   |
| 07352                                  | PP2C protein phosphatase                       | 32 | 3 |   |   | X | -1.3  | 6.2E-01 |   |
| 01770                                  | MRS7 family protein                            | 75 | 3 |   |   | X | -4.1  | 3.6E-02 |   |
| 02585                                  | RfeF                                           | 51 | 3 |   |   | X | 1.5   | 3.3E-01 |   |
| 03249                                  | mRNA export protein Mlo3                       | 22 | 3 |   |   | X | -1.3  | 8.9E-01 |   |
| 05827                                  | tRNA binding protein                           | 41 | 3 |   |   | X | 2.1   | 5.7E-01 |   |
| 04209                                  | voltage-gated potassium channel beta-2 subunit | 40 | 3 |   |   | X | -31.3 | 3.5E-01 |   |
| 02754                                  | 40S ribosomal protein S12                      | 16 | 2 |   |   | X | 3.3   | 9.0E-03 | X |
| 03627                                  | cyclophilin A                                  | 17 | 2 |   |   | X | -8.7  | 2.1E-01 |   |
| 04439                                  | vacuolar ATP synthase                          | 57 | 2 |   |   | X | 21.2  | 3.6E-02 |   |
| 00626                                  | conserved hypothetical protein                 | 24 | 2 |   |   | X | -5.2  | 2.0E-02 |   |

\* A CNAG number based on the *C. neoformans* H99 database (Broad Institute)

\*\*A negative number indicates a fold change increase in binding at 37°C.
